# Supplementary material for: Exploring the Remarkably High Photocatalytic Efficiency of Ultra-Thin Porous Graphitic Carbon Nitride Nanosheets
Source: MDPI journal article supplement (doi:10.3390/nano14010103), 2024-01-01
Supplement: s1 [file s1]

# Exploring the Remarkably High Photocatalytic Efficiency of Ultra-Thin Porous Graphitic Carbon Nitride Nanosheets

Zahra Kalantari Bolaghi, Cristina Rodriguez-Seco \*, Aycan Yurtsever and Dongling Ma \*

Centre Énergie Matériaux et Télécommunications, Institut National de la Recherche Scientifique (INRS),  
Varenes, QC J3X 1P7, Canada; zahra.kalantari@inrs.ca (Z.K.B.); aycan.yurtsever@inrs.ca (A.Y.)

\* Correspondence: cristina.rodriguez.seco@inrs.ca (C.R.-S.); dongling.ma@inrs.ca (D.M.)

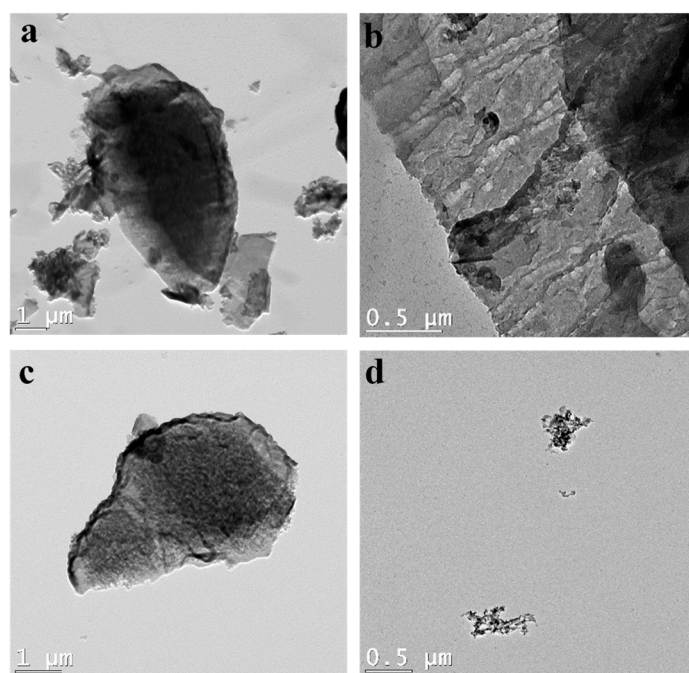

**Figure S1.** TEM images of thermally exfoliated g-C<sub>3</sub>N<sub>4</sub> samples: (a and b) 550-CN and (c and d) 600-CN.

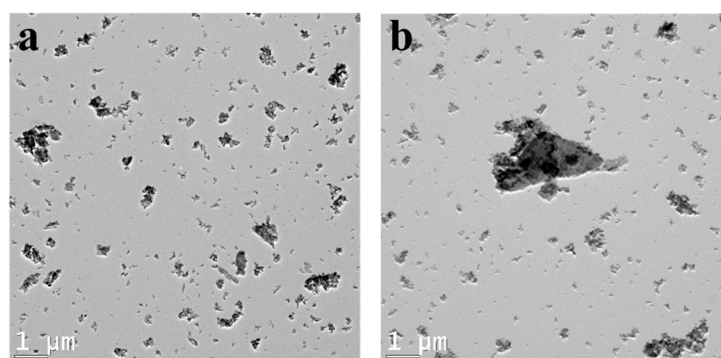

**Figure S2.** g-C<sub>3</sub>N<sub>4</sub> sample ultrasonicated in acid media for 40 min (500-AUCN-40 min).

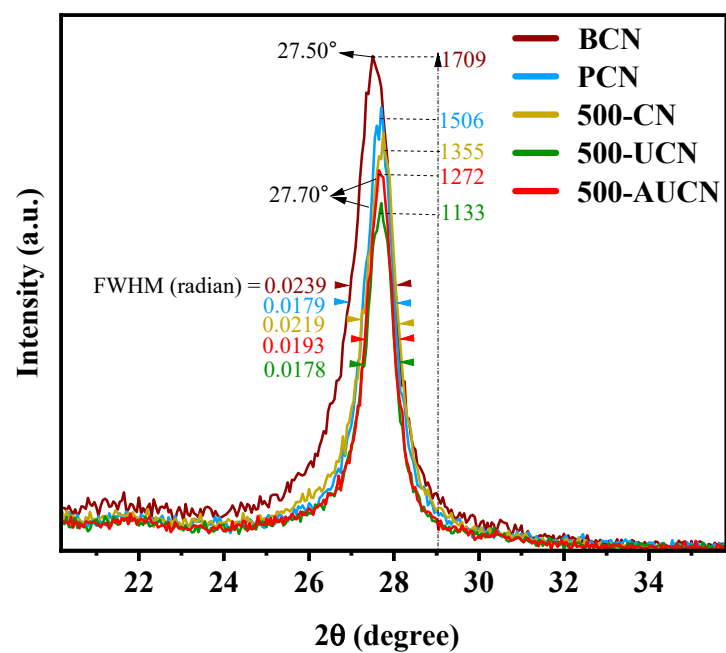

Figure S3. Enlarged view of (002) peak of XRD for g-C<sub>3</sub>N<sub>4</sub> samples.

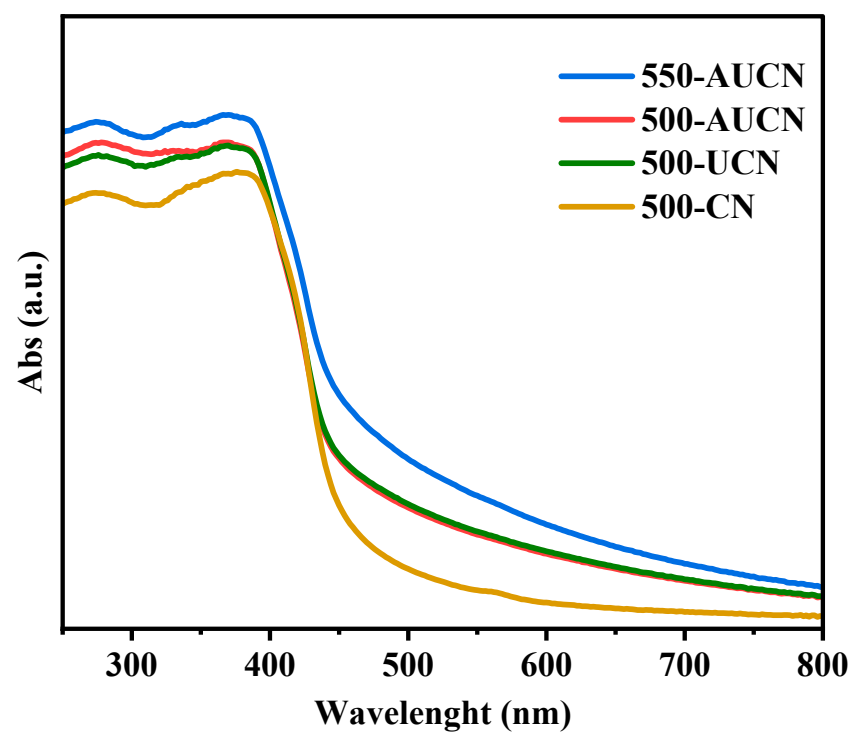

Figure S4. DRS spectra of g-C<sub>3</sub>N<sub>4</sub> samples prepared under different conditions.

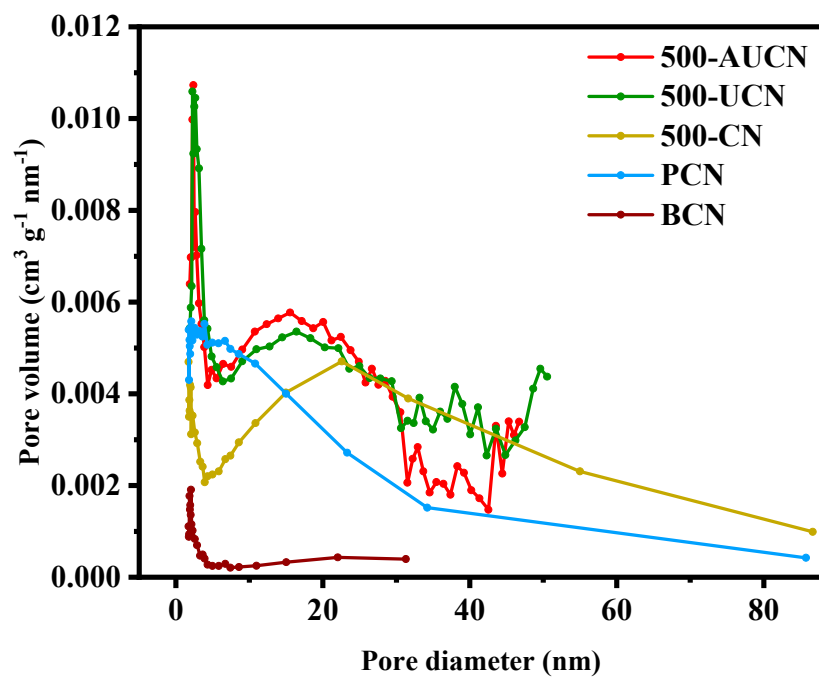

Figure S5. Pore size distribution curves of different g-C<sub>3</sub>N<sub>4</sub> samples.

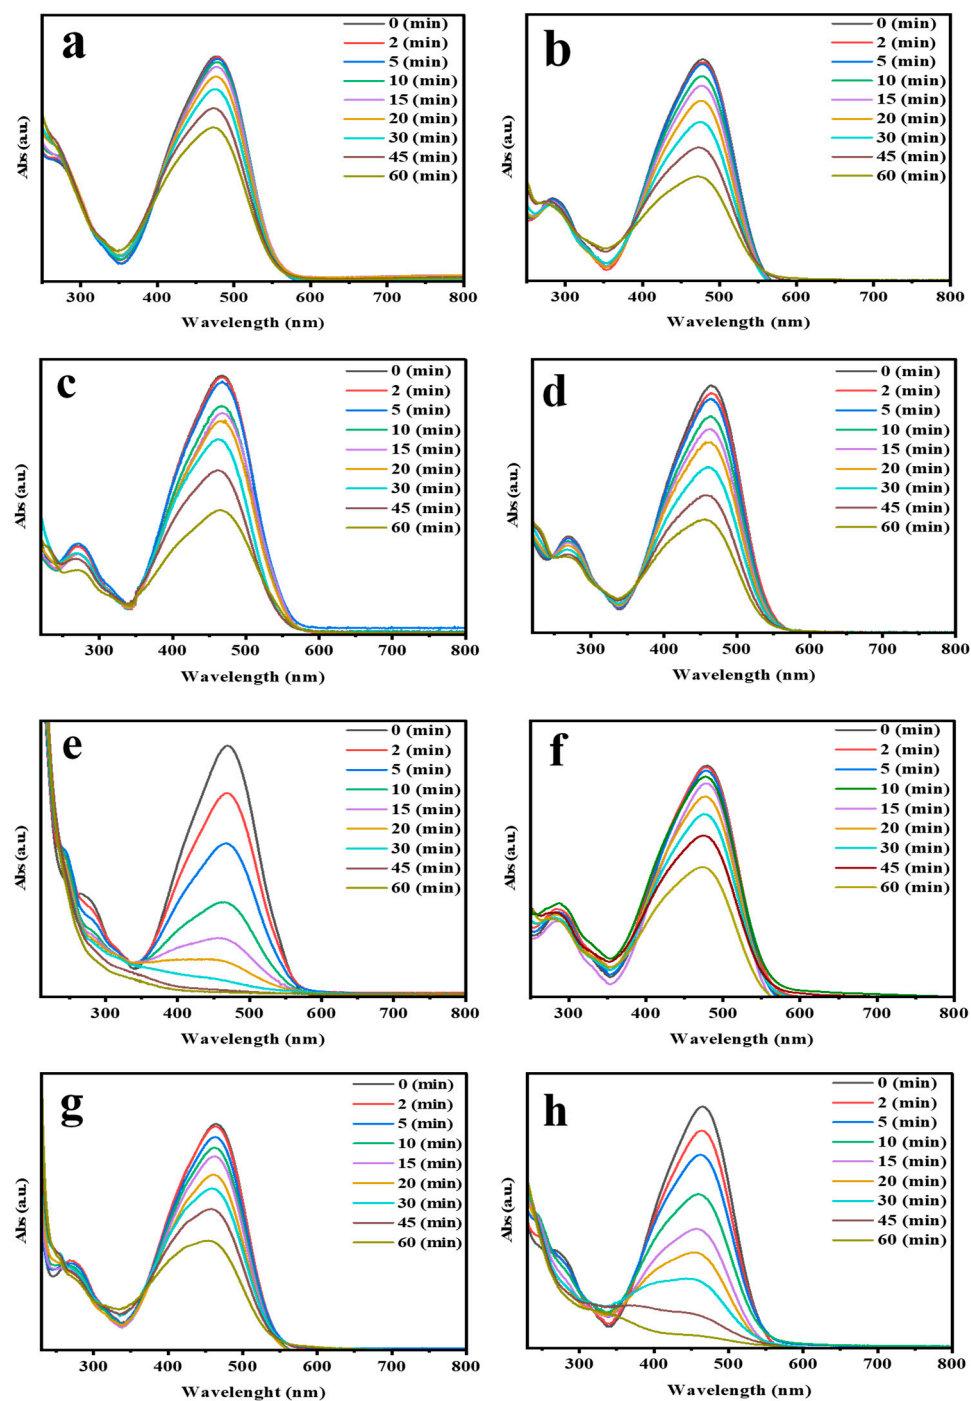

**Figure S6.** Visible light degradation spectra of MO using samples (a) 500-CN, (b) 500-UCN (c) 550-CN, (d) 550-UCN, (e) 550-AUCN, (f) 600-CN, (g) 600-UCN, and (h) 600-AUCN.

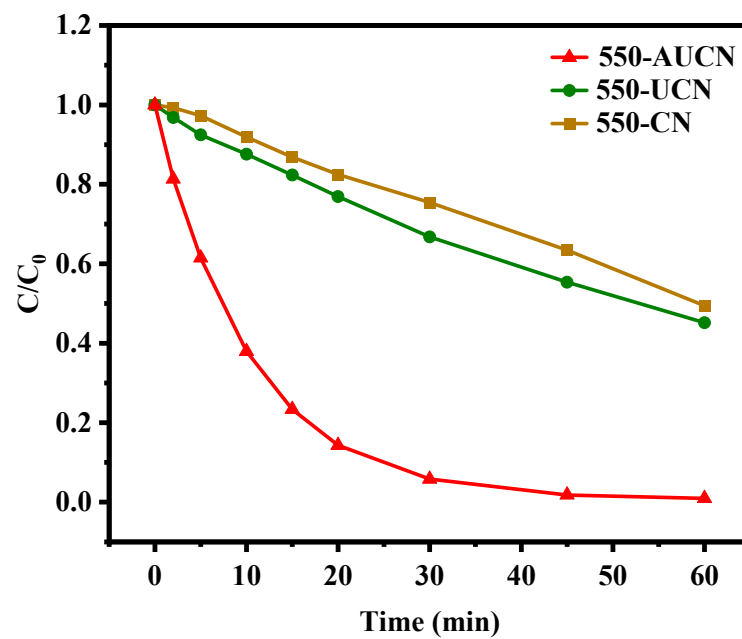

**Figure S7.** Photocatalytic degradation of MO under visible light using photocatalyst samples exfoliated at 550 °C.

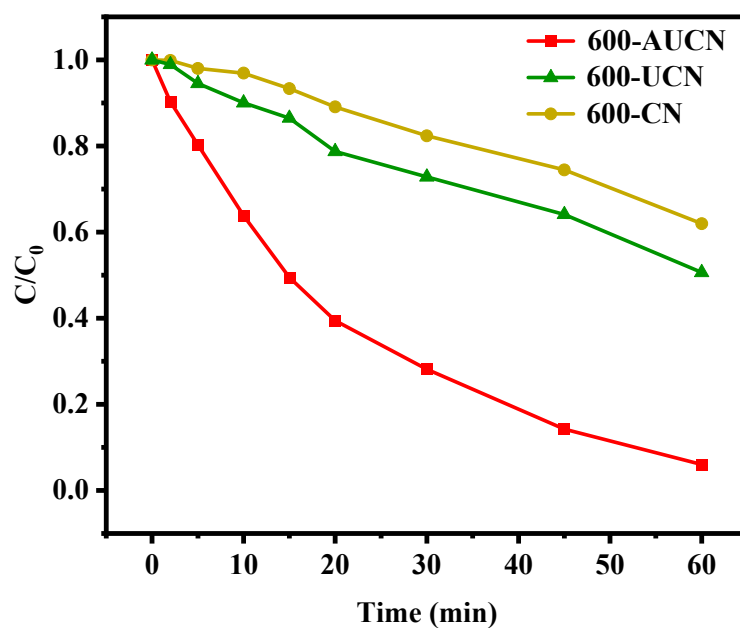

**Figure S8.** Photocatalytic degradation of MO under visible light, using photocatalyst samples exfoliated at 600 °C.

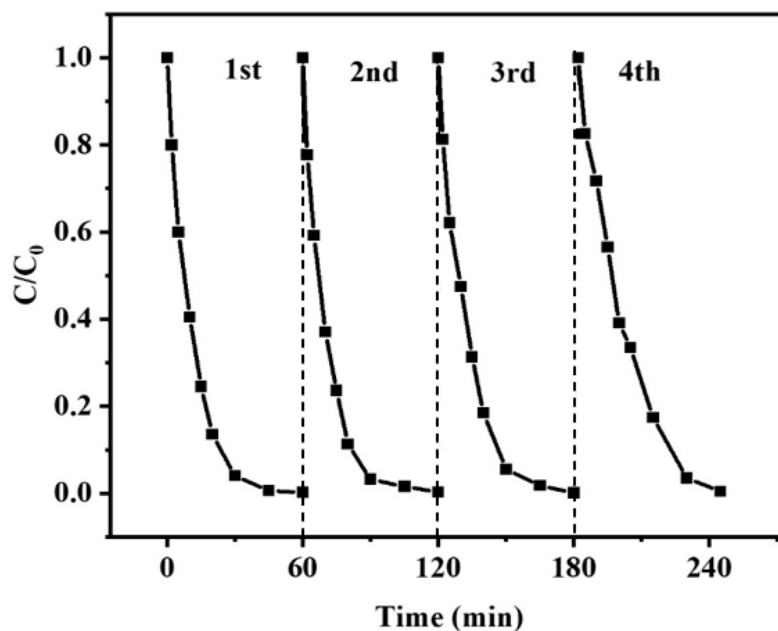

**Figure S9.** Photocatalytic stability of 500-AUCN in four successive cycling reactions under visible light irradiation.

**Table S1.** Normalized reaction rate ( $k$ ) values for the MO photodegradation reaction in the presence of photocatalytic samples exfoliated at 550 °C and 600 °C.

| Sample   | $k$ ( $10^{-3} \text{ min}^{-1} \text{ mg}^{-1}$ ) |
|----------|----------------------------------------------------|
| 550-AUCN | 8.0                                                |
| 600-AUCN | 4.5                                                |
| 550-UCN  | 1.3                                                |
| 600-UCN  | 1.0                                                |
| 550-CN   | 1.1                                                |
| 600-CN   | 0.7                                                |

**Table S2.** Performance of  $\text{C}_3\text{N}_4$ -based samples for degradation of MO under visible light irradiation in recently published literatures.

| Refer-ences | Photocatalyst                                   | Mass (mg) | Vol-ume (mL) | MO con-centration ( $\text{mg L}^{-1}$ ) | Light source                | $k$ value ( $10^{-3} \text{ min}^{-1} \text{ mg}^{-1}$ ) |
|-------------|-------------------------------------------------|-----------|--------------|------------------------------------------|-----------------------------|----------------------------------------------------------|
| [1]         | Porous Nanosheet                                | 40        | 80           | 5                                        | > 420 nm 300 W Xenon lamp   | 1.95                                                     |
| [2]         | Porous Nanosheet                                | 25        | 50           | 5                                        | > 420 nm 500 W Xenon lamp   | 0.31                                                     |
| [3]         | PCZ QDs/g- $\text{C}_3\text{N}_4$               | 10        | 25           | 10                                       | > 420 nm 300 W Xenon lamp   | 2.10                                                     |
| [4]         | $\text{V}_2\text{O}_5/\text{P-g-C}_3\text{N}_4$ | 50        | 50           | 10                                       | > 420 nm 500 W Xenon lamp   | 0.43                                                     |
| [5]         | $\text{Cu/ZnO-g-C}_3\text{N}_4$                 | 50        | 100          | 10                                       | Visible light, Mercury lamp | 2.80                                                     |
| [6]         | $\text{Ag/g-C}_3\text{N}_4$                     | 25        | 100          | 10                                       | > 420 nm 300 W Xenon lamp   | 1.00                                                     |

|                  |                                                                                                |    |     |    |                                |       |
|------------------|------------------------------------------------------------------------------------------------|----|-----|----|--------------------------------|-------|
| [7]              | Na-doped g-C <sub>3</sub> N <sub>4</sub>                                                       | 20 | 50  | 10 | > 420 nm 500 W Xenon lamp      | 1.30  |
| [8]              | g-C <sub>3</sub> N <sub>4</sub> /Ag/P <sub>3</sub> HT                                          | 60 | 30  | 10 | > 420 nm 100 W LED lamp        | 0.18  |
| [9]              | CNS-TiO <sub>2</sub> /g-C <sub>3</sub> N <sub>4</sub> <sup>a</sup>                             | 20 | 50  | 20 | > 420 nm 300 W Xenon lamp      | 3.45  |
| [10]             | NG@g-C <sub>3</sub> N <sub>4</sub> <sup>b</sup>                                                | 60 | 100 | 10 | Visible light                  | 0.45  |
| [11]             | MoS <sub>2</sub> /Fe <sub>3</sub> O <sub>4</sub> /g-C <sub>3</sub> N <sub>4</sub> <sup>c</sup> | 40 | 20  | 10 | Visible light, 60 W LED lamp   | 6.57  |
| <b>This work</b> | Ultrathin Porous Nanosheet                                                                     | 10 | 25  | 10 | Visible light 300 W Xenon lamp | 11.70 |

<sup>a</sup> carbon–nitrogen–sulfur co-doped TiO<sub>2</sub>/g-C<sub>3</sub>N<sub>4</sub>, <sup>b</sup> N-doped graphene covalently grafted with g-C<sub>3</sub>N<sub>4</sub>, <sup>c</sup> quantum dots of graphitic carbon nitride (g-C<sub>3</sub>N<sub>4</sub>) and Fe<sub>3</sub>O<sub>4</sub> nanoparticles were decorated on MoS<sub>2</sub> nan.

## References

- Long, B.; Yan, G.; He, H.; Meng, S. Porous and Few-Layer Carbon Nitride Nanosheets via Surface Steam Etching for Enhanced Photodegradation Activity. *ACS Appl. Nano Mater.* **2022**, *5*, 7798–7810, doi:10.1021/acsnm.2c00820.
- Xu, R.; Li, J.; Sui, G.; Zhuang, Y.; Guo, D.; Luo, Z.; Liang, S.; Yao, H.; Wang, C.; Chen, S. Constructing Supramolecular Self-Assembled Porous g-C<sub>3</sub>N<sub>4</sub> Nanosheets Containing Thiophene-Groups for Excellent Photocatalytic Performance under Visible Light. *Applied Surface Science* **2022**, *578*, 152064, doi:10.1016/j.apsusc.2021.152064.
- Zhang, Q.; Yang, F.; Zhou, S.; Bao, N.; Xu, Z.; Chaker, M.; Ma, D. Broadband Photocatalysts Enabled by 0D/2D Heterojunctions of near-Infrared Quantum Dots/Graphitic Carbon Nitride Nanosheets. *Applied Catalysis B: Environmental* **2020**, *270*, 118879, doi:10.1016/j.apcatb.2020.118879.
- Zhang, X.; Jia, X.; Duan, P.; Xia, R.; Zhang, N.; Cheng, B.; Wang, Z.; Zhang, Y. V<sub>2</sub>O<sub>5</sub>/P-g-C<sub>3</sub>N<sub>4</sub> Z-Scheme Enhanced Heterogeneous Photocatalytic Removal of Methyl Orange from Water under Visible Light Irradiation. *Colloids and Surfaces A: Physicochemical and Engineering Aspects* **2021**, *608*, 125580, doi:10.1016/j.colsurfa.2020.125580.
- Kampalapura Swamy, C.; Hezam, A.; Mavinakere Ramesh, A.; Habbanakuppe Ramakrishnegowda, D.; K. Purushothama, D.; Krishnegowda, J.; Kanchugarakoppal S., R.; Shivanna, S. Microwave Hydrothermal Synthesis of Copper Induced ZnO/g-C<sub>3</sub>N<sub>4</sub> Heterostructure with Efficient Photocatalytic Degradation through S-Scheme Mechanism. *Journal of Photochemistry and Photobiology A: Chemistry* **2021**, *418*, 113394, doi:10.1016/j.jphotochem.2021.113394.
- Liu, R.; Yang, W.; He, G.; Zheng, W.; Li, M.; Tao, W.; Tian, M. Ag-Modified g-C<sub>3</sub>N<sub>4</sub> Prepared by a One-Step Calcination Method for Enhanced Catalytic Efficiency and Stability. *ACS Omega* **2020**, *5*, 19615–19624, doi:10.1021/acsomega.0c02161.
- Dou, Q.; Hou, J.; Hussain, A.; Zhang, G.; Zhang, Y.; Luo, M.; Wang, X.; Cao, C. One-Pot Synthesis of Sodium-Doped Willow-Shaped Graphitic Carbon Nitride for Improved Photocatalytic Activity under Visible-Light Irradiation. *Journal of Colloid and Interface Science* **2022**, *624*, 79–87, doi:10.1016/j.jcis.2022.05.085.
- Liu, F.; Nguyen, T.-P.; Wang, Q.; Massuyeau, F.; Dan, Y.; Jiang, L. Construction of Z-Scheme g-C<sub>3</sub>N<sub>4</sub>/Ag/P<sub>3</sub>HT Heterojunction for Enhanced Visible-Light Photocatalytic Degradation of Tetracycline (TC) and Methyl Orange (MO). *Applied Surface Science* **2019**, *496*, 143653, doi:10.1016/j.apsusc.2019.143653.
- Huang, Z.; Jia, S.; Wei, J.; Shao, Z. A Visible Light Active, Carbon–Nitrogen–Sulfur Co-Doped TiO<sub>2</sub>/g-C<sub>3</sub>N<sub>4</sub> Z-Scheme Heterojunction as an Effective Photocatalyst to Remove Dye Pollutants. *RSC Advances* **2021**, *11*, 16747–16754, doi:10.1039/D1RA01890F.
- Santha kumar, K.; Vellaichamy, B.; Paulmony, T. Visible Light Active Metal-Free Photocatalysis: N-Doped Graphene Covalently Grafted with g-C<sub>3</sub>N<sub>4</sub> for Highly Robust Degradation of Methyl Orange. *Solid State Sciences* **2019**, *94*, 99–105, doi:10.1016/j.solidstatesciences.2019.06.003.
- G-C<sub>3</sub>N<sub>4</sub> Quantum Dot Decorated MoS<sub>2</sub>/Fe<sub>3</sub>O<sub>4</sub> as a Novel Recoverable Catalyst for Photodegradation of Organic Pollutant under Visible Light | Journal of Materials Science: Materials in Electronics Available online: <https://link.springer.com/article/10.1007/s10854-021-06790-w> (accessed on 29 November 2023).
